# Supplementary material
Source: publisher figshare collection journal article supplement (https://gsajournals.figshare.com/articles/dataset/_/12691859)
Supplement: Supplementary file 2 [file 1]

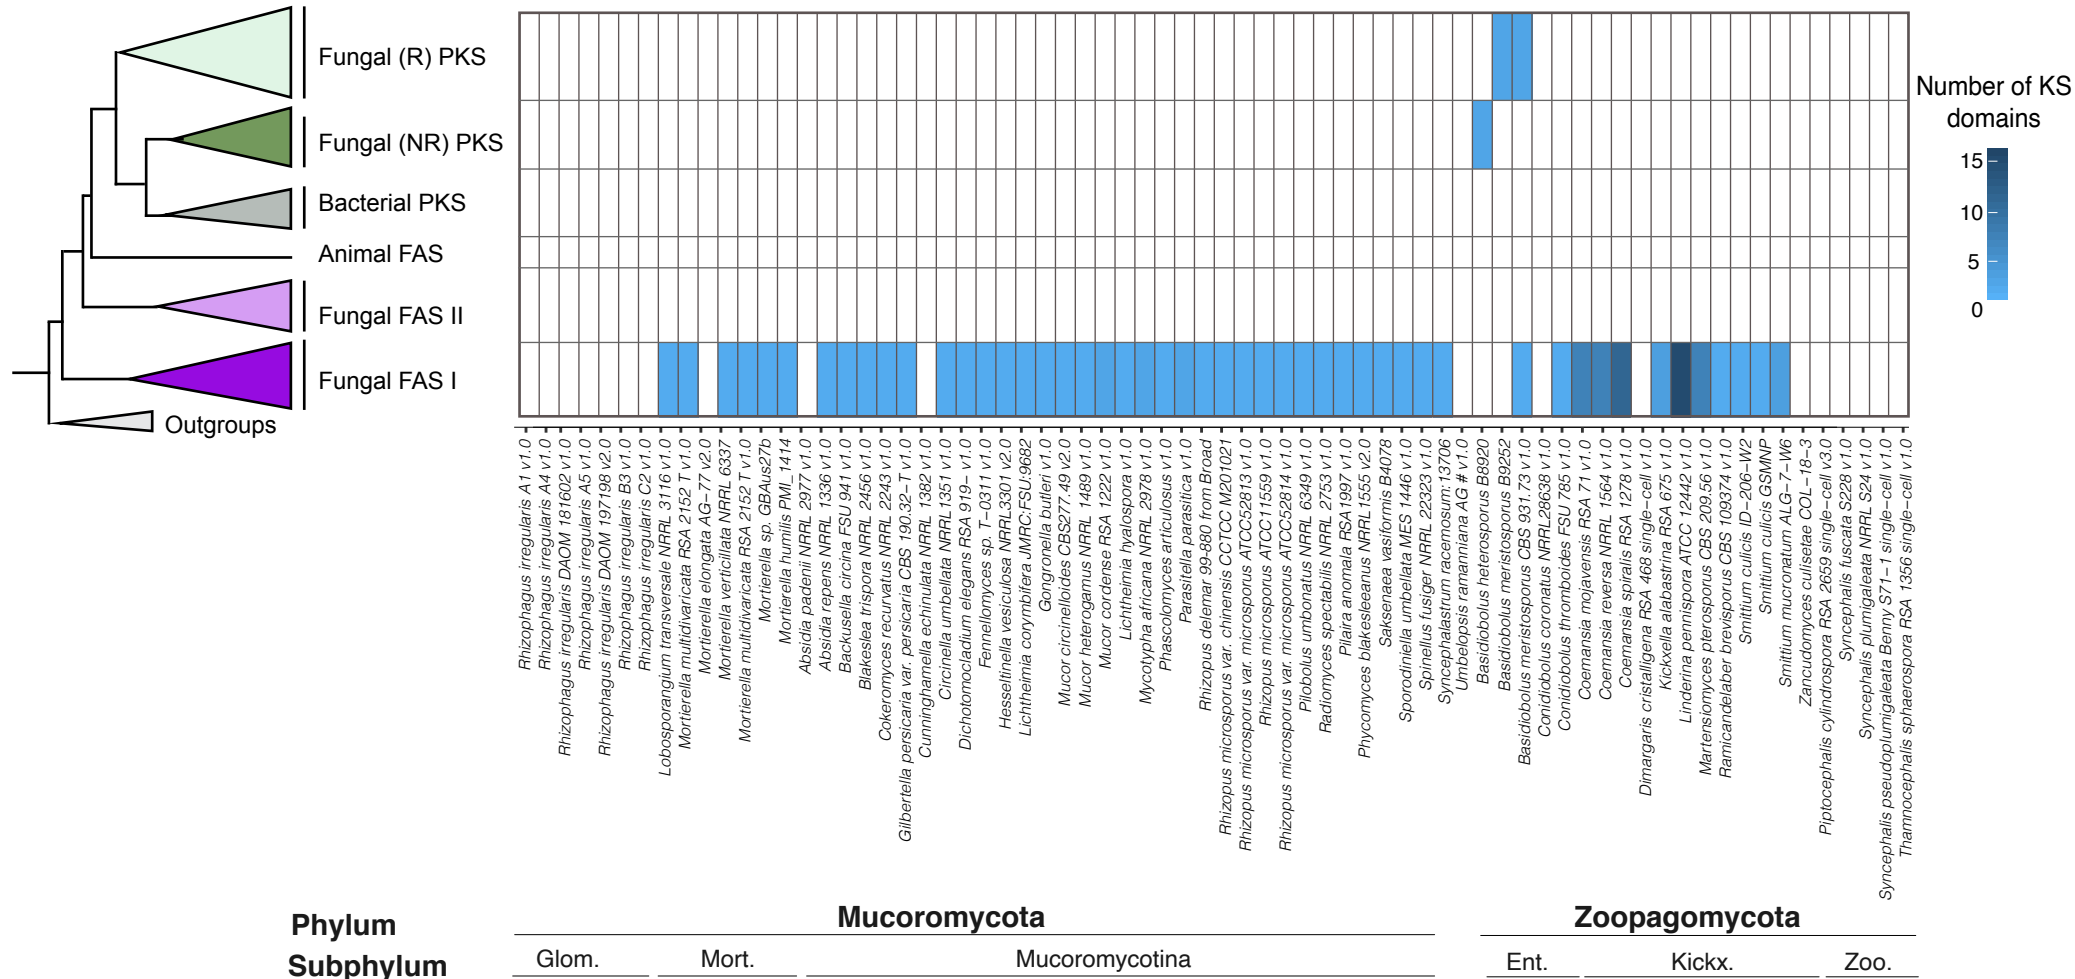

Supplementary Figure 3. Phylogenetic sources and abundance of KS-domains from PKS predicted gene models for Zoopagomycota and Mucoromycota species. The heatmap (right) represents the abundances KS-domains predicted for each domain clustered within each clade. Glom.: Glomeromycotina. Mort.: Morteriellomycotina. Ent.: Entomophthoromycotina. Kickx.: Kickxellomycotina. Zoo.: Zoopagomycotina
