# Supplementary material
Source: publisher figshare collection journal article supplement (https://gsajournals.figshare.com/articles/dataset/_/12691859)
Supplement: Supplementary file 8 [file 1]

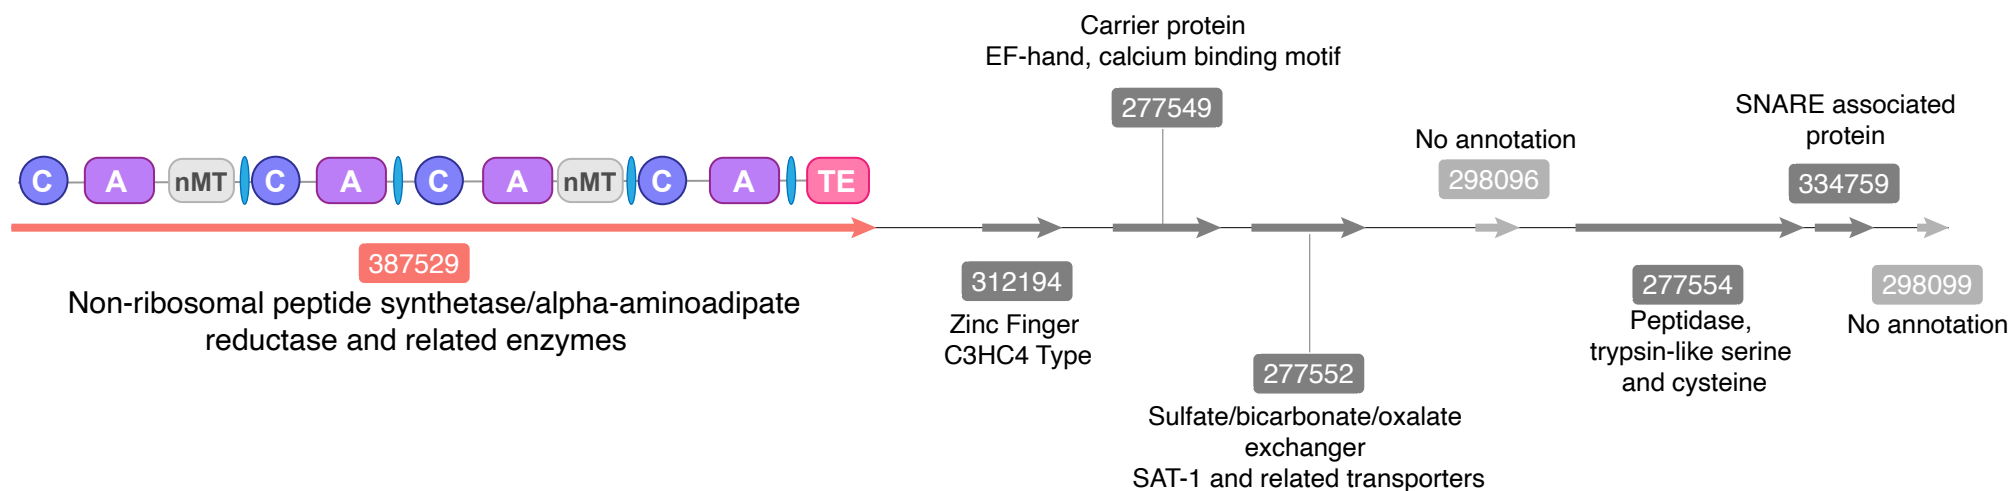

## NRPS Cluster 5 (*B. meristosporus* CBS 931.73)

Supplementary Figure 2. Graphic representation of the Cluster 5 (NRPS) of *B. meristosporus* CBS 931.73. The SM gene model associated to Cluster 5 (387529; NRPS) contains 4 A-domains clustered within the CYCLO clade of the NRPS phylogenetic tree (Figure 3). This clade contains the A-domains of *Tolypocladium inflatum* cyclosporin NRPS gene. Domains of the NRPS protein are illustrated above the arrow representing the gene. Dark purple: Condensation; Light Purple: Adenylation; Grey: n-Methylation; Pink: Thioesterase. The arrows in grey represent the additional gene models predicted to be part of Cluster 5.
