# Supplementary material
Source: publisher figshare collection journal article supplement (https://gsajournals.figshare.com/articles/dataset/_/12691859)
Supplement: Supplementary file 9 [file 1]

Zoopagomycota

Mucoromycota

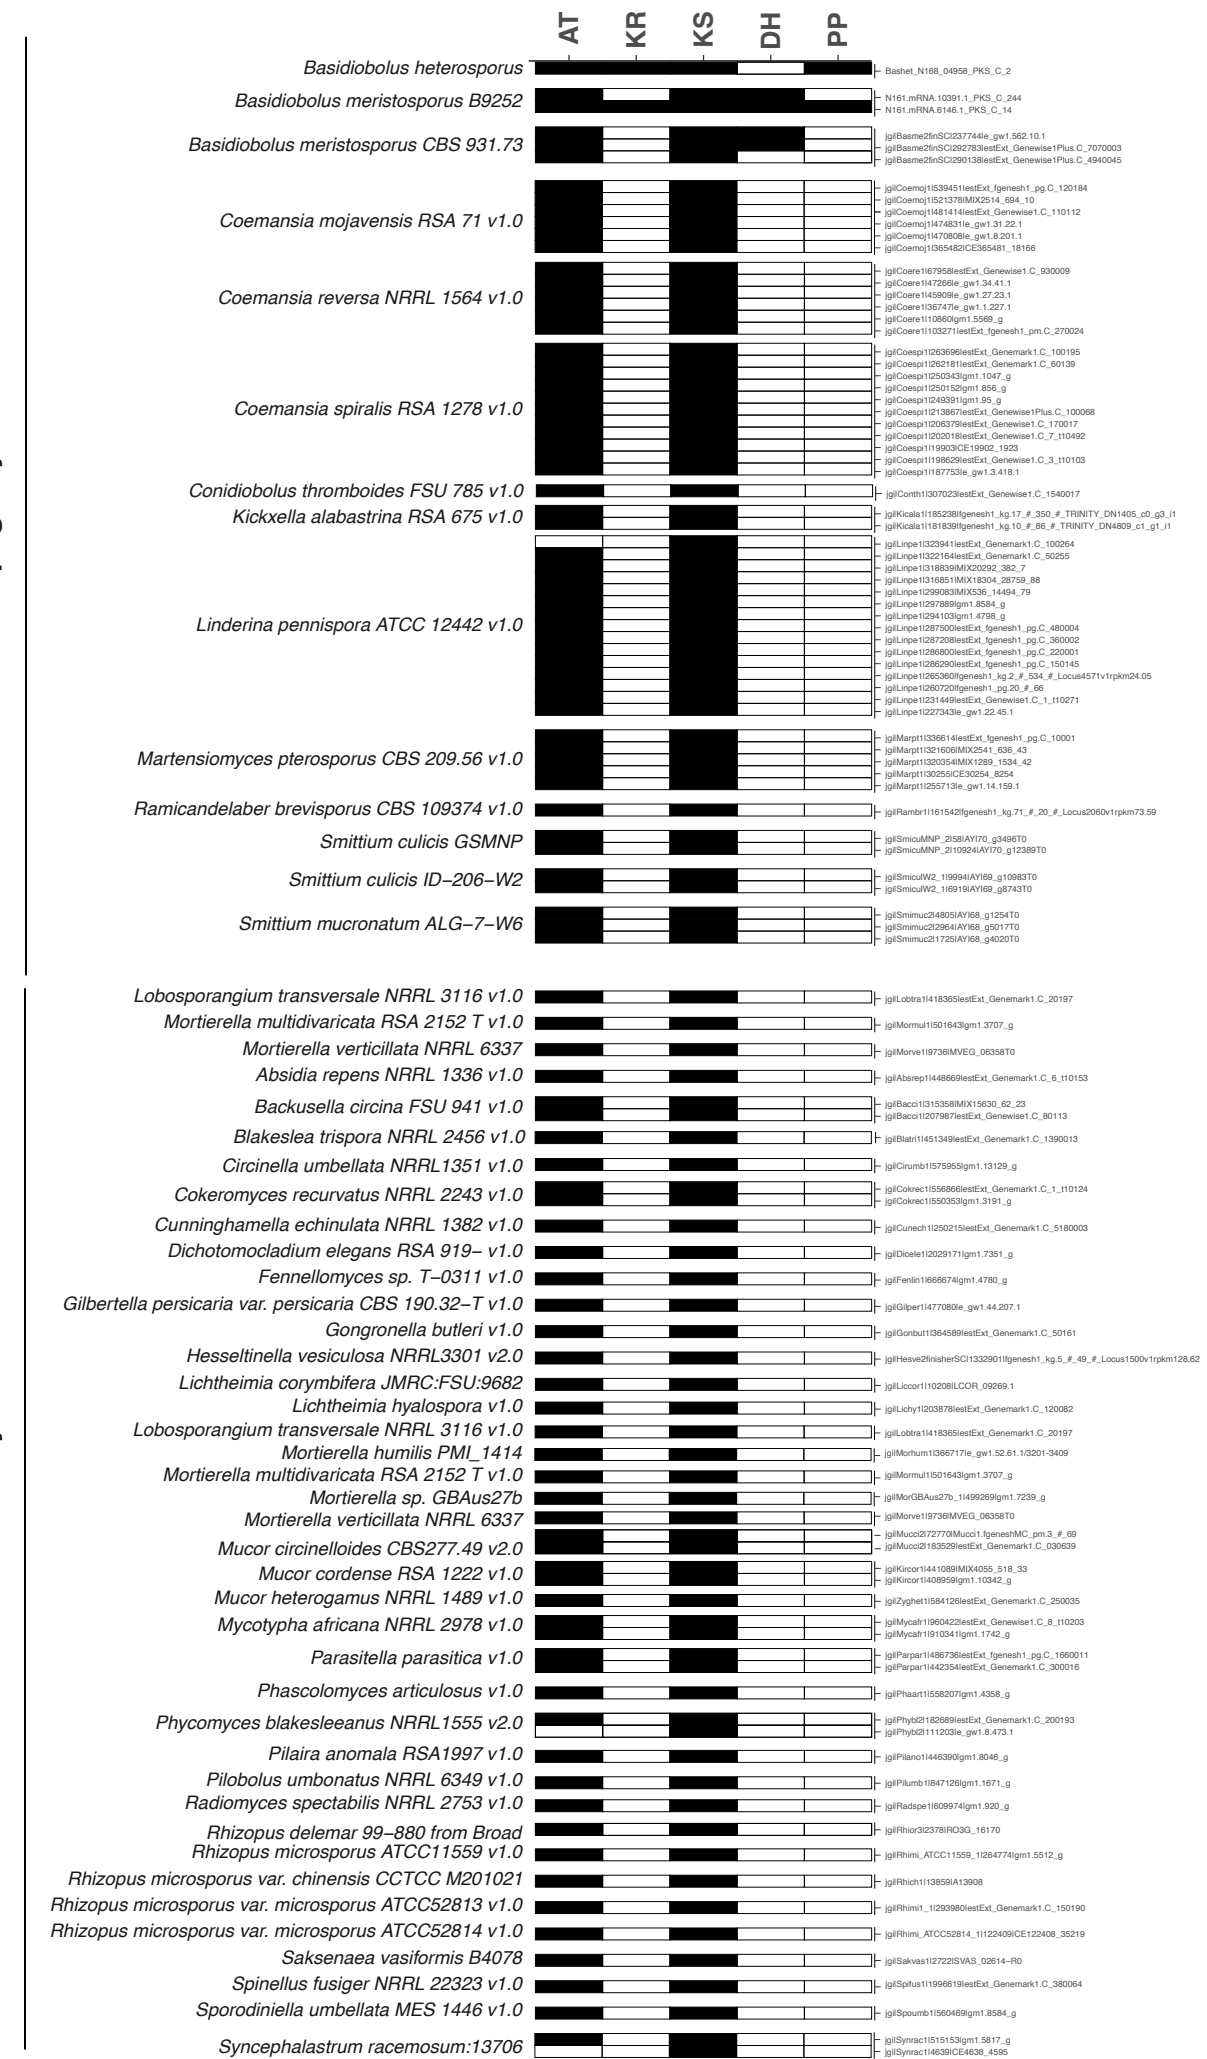

AntiSMASH

JGI/SMURF

Subphylum

Species

PKS Domain

Protein

SM prediction source

■ Presence  
□ Absence

Supplementary Figure 6. Presence and absence of domains characteristic of PKS core gene models in zygomycete species. Shaded colors indicate presence.
