# Supplementary material
Source: publisher figshare collection journal article supplement (https://gsajournals.figshare.com/articles/dataset/_/12691859)
Supplement: Supplementary file 10 [file 1]

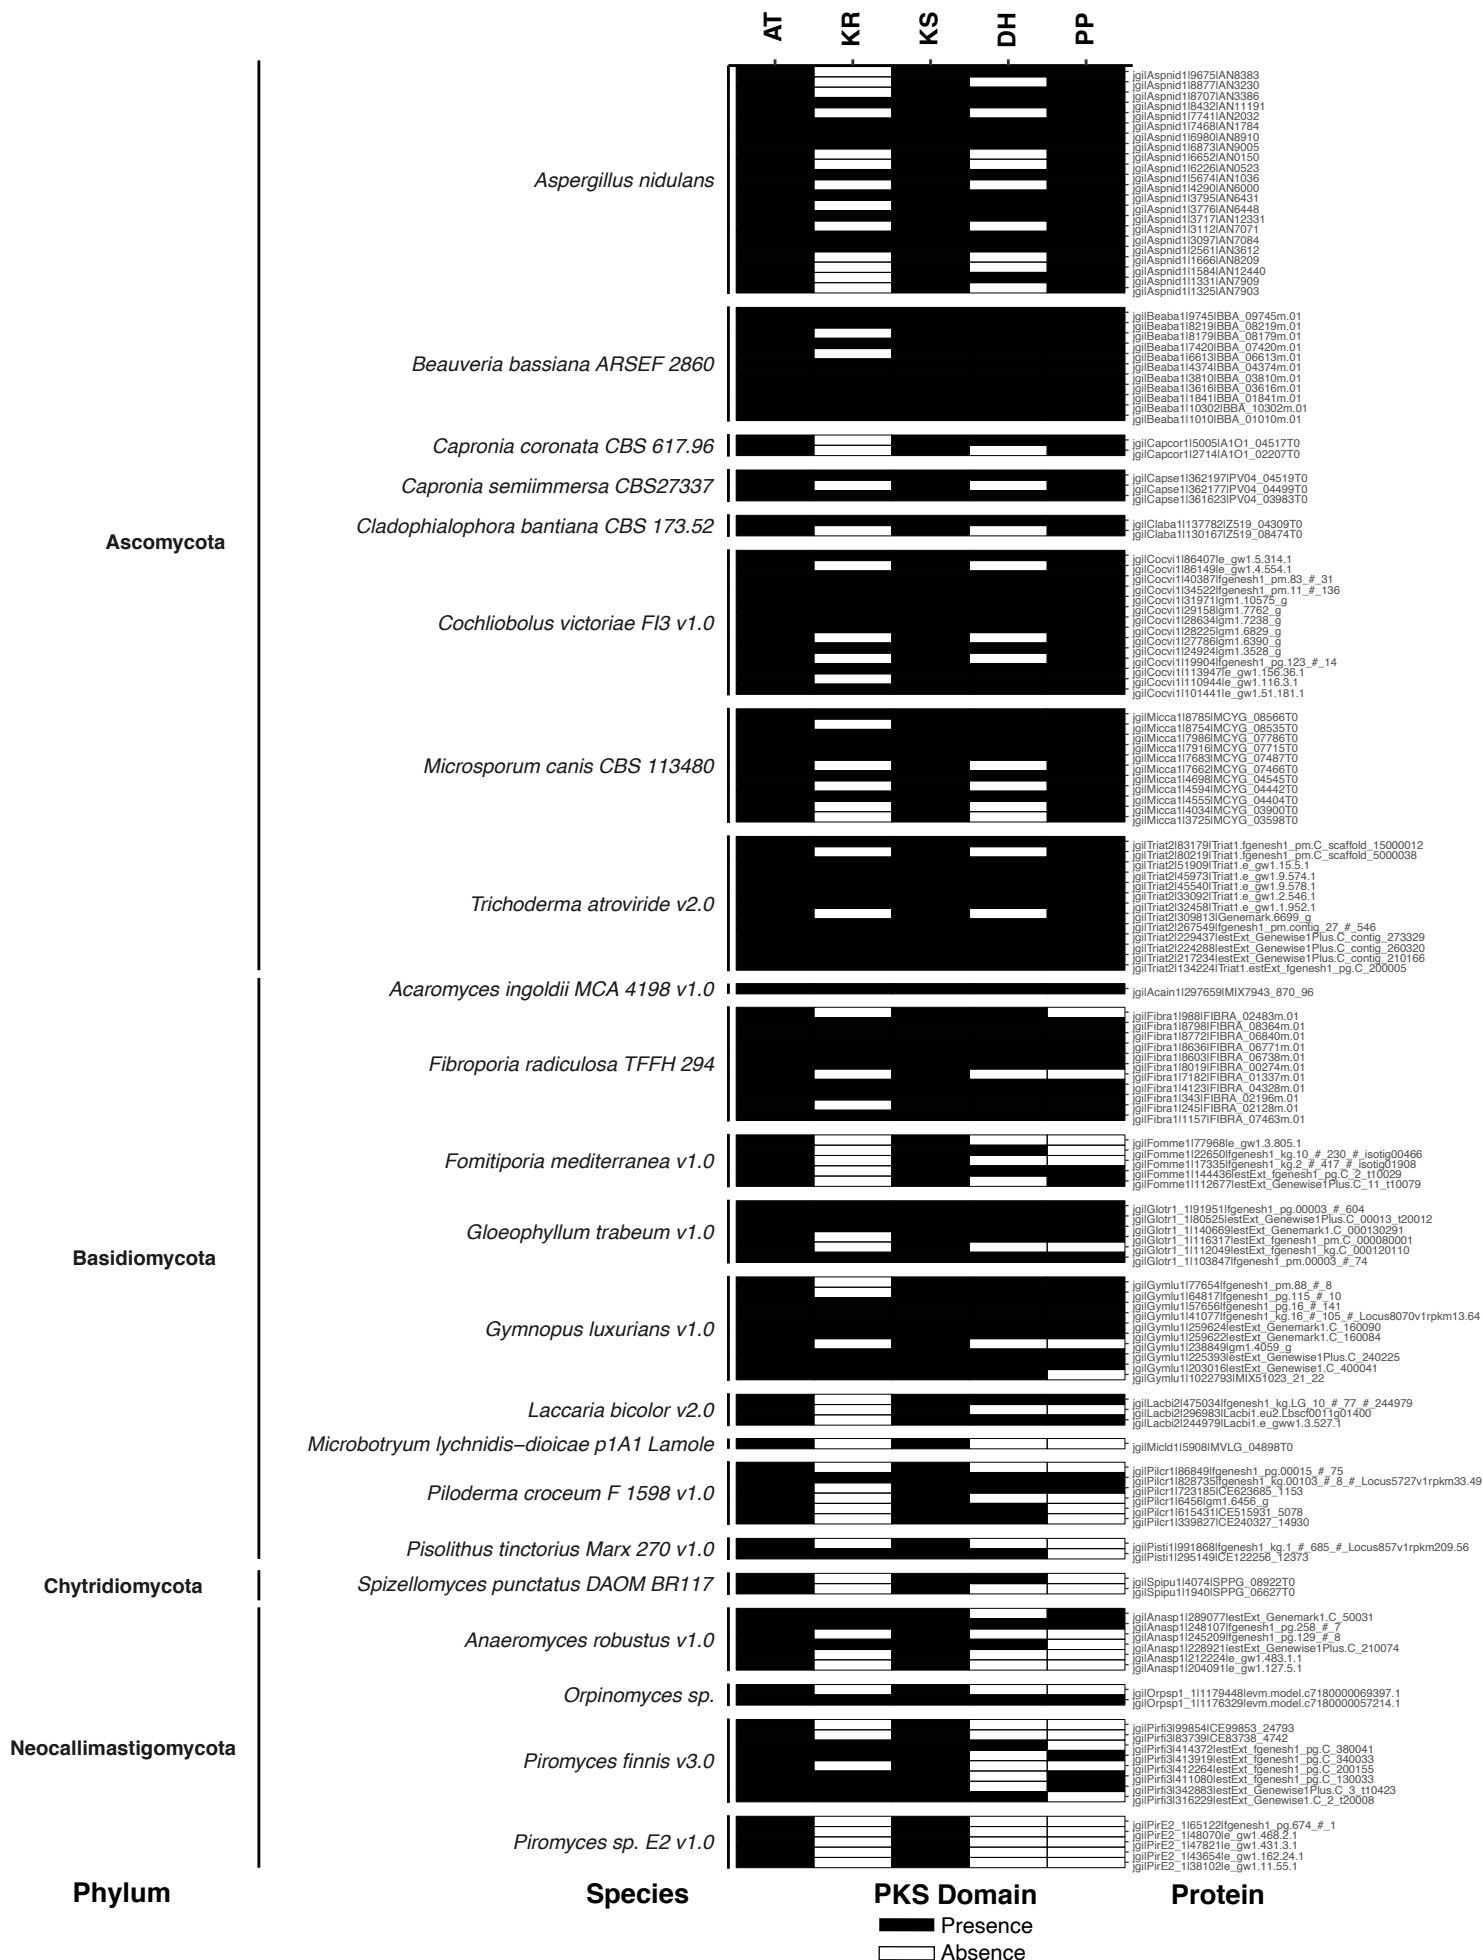

Supplementary Figure 5. Presence and absence of domains characteristic of PKS core gene models in non-zygomycete Fungal species. Shaded colors indicate presence.
