# Supplementary material
Source: publisher figshare collection journal article supplement (https://gsajournals.figshare.com/articles/dataset/_/12691859)
Supplement: Supplementary file 11 [file 1]

*Basidiobolus meristosporus* CBS 931.73

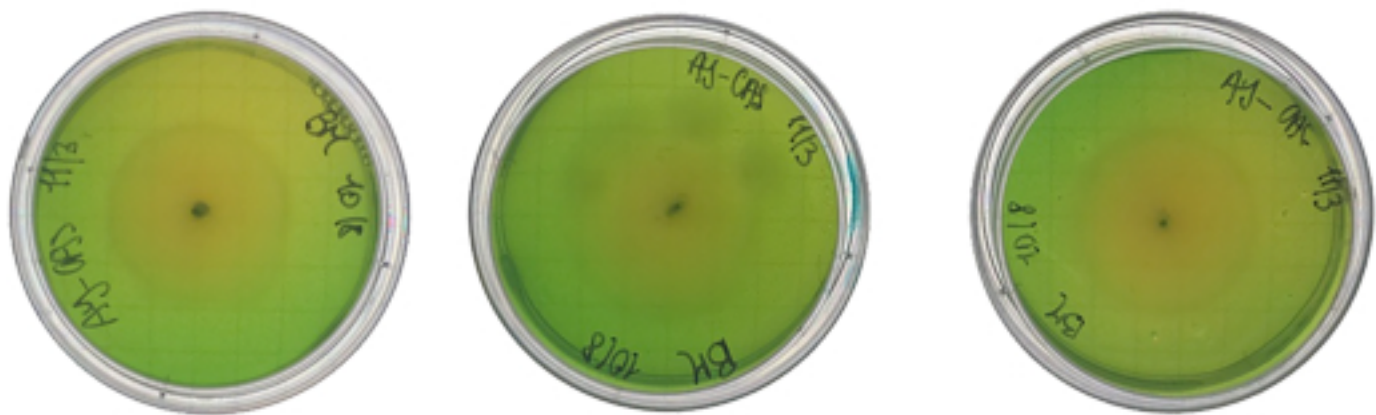

*Cladosporium* sp. PE-07

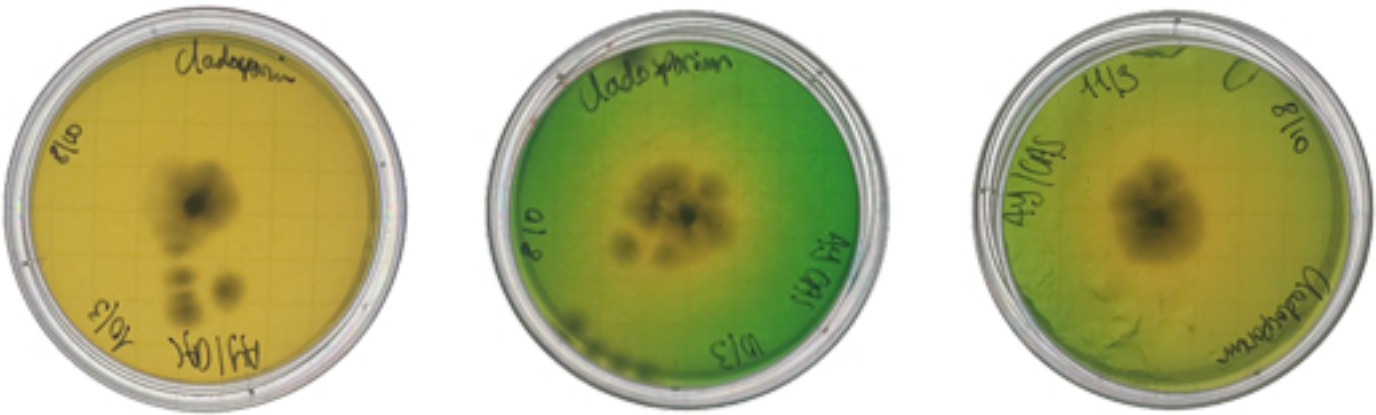

*Conidiobolus thromboides* FSU 785

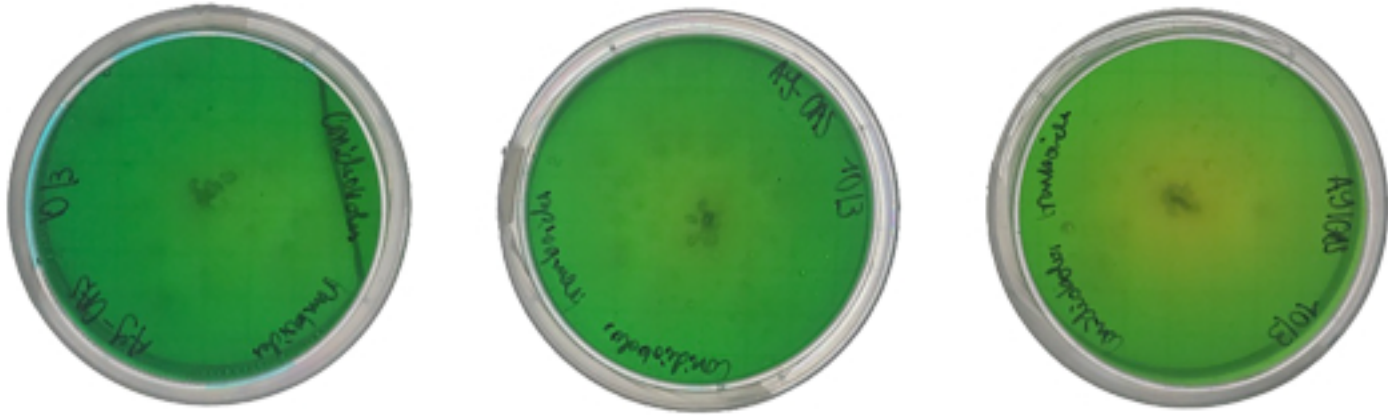

Empty plates (Negative control)

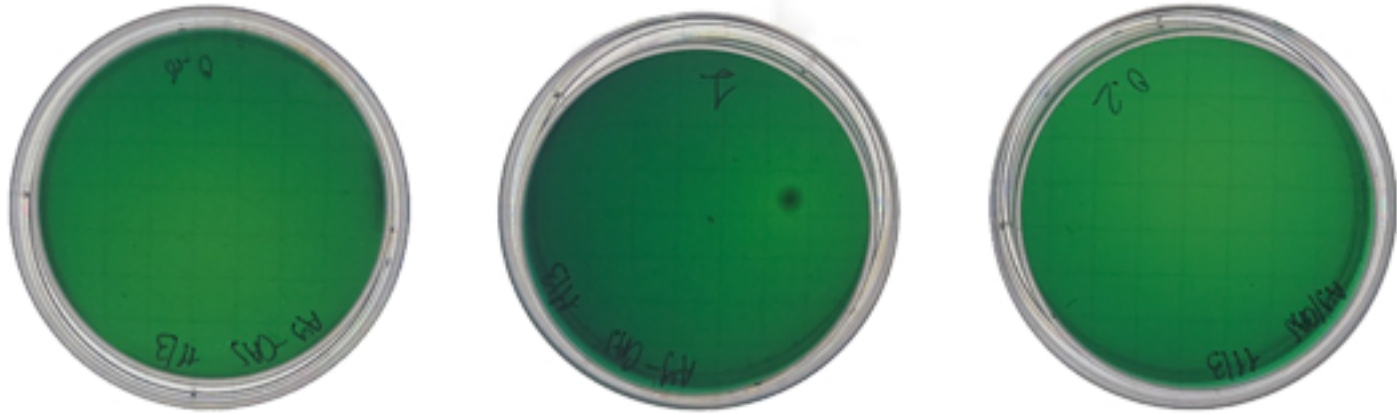

Supplementary Figure 12. Siderophore activity assay AY-CAS plates after 12 days for *Basidiobolus meristosporus* CBS 931.73, *Cladosporium* sp. PE-07, *Conidiobolus thromboides* FSU-785, and an empty plate as negative control. The AY-CAS starts with the greenish-blue color as shown by the empty plates, and turns yellow as siderophores remove the iron from the CAS assay complex.
