# Supplementary material
Source: publisher figshare collection journal article supplement (https://gsajournals.figshare.com/articles/dataset/_/12691859)

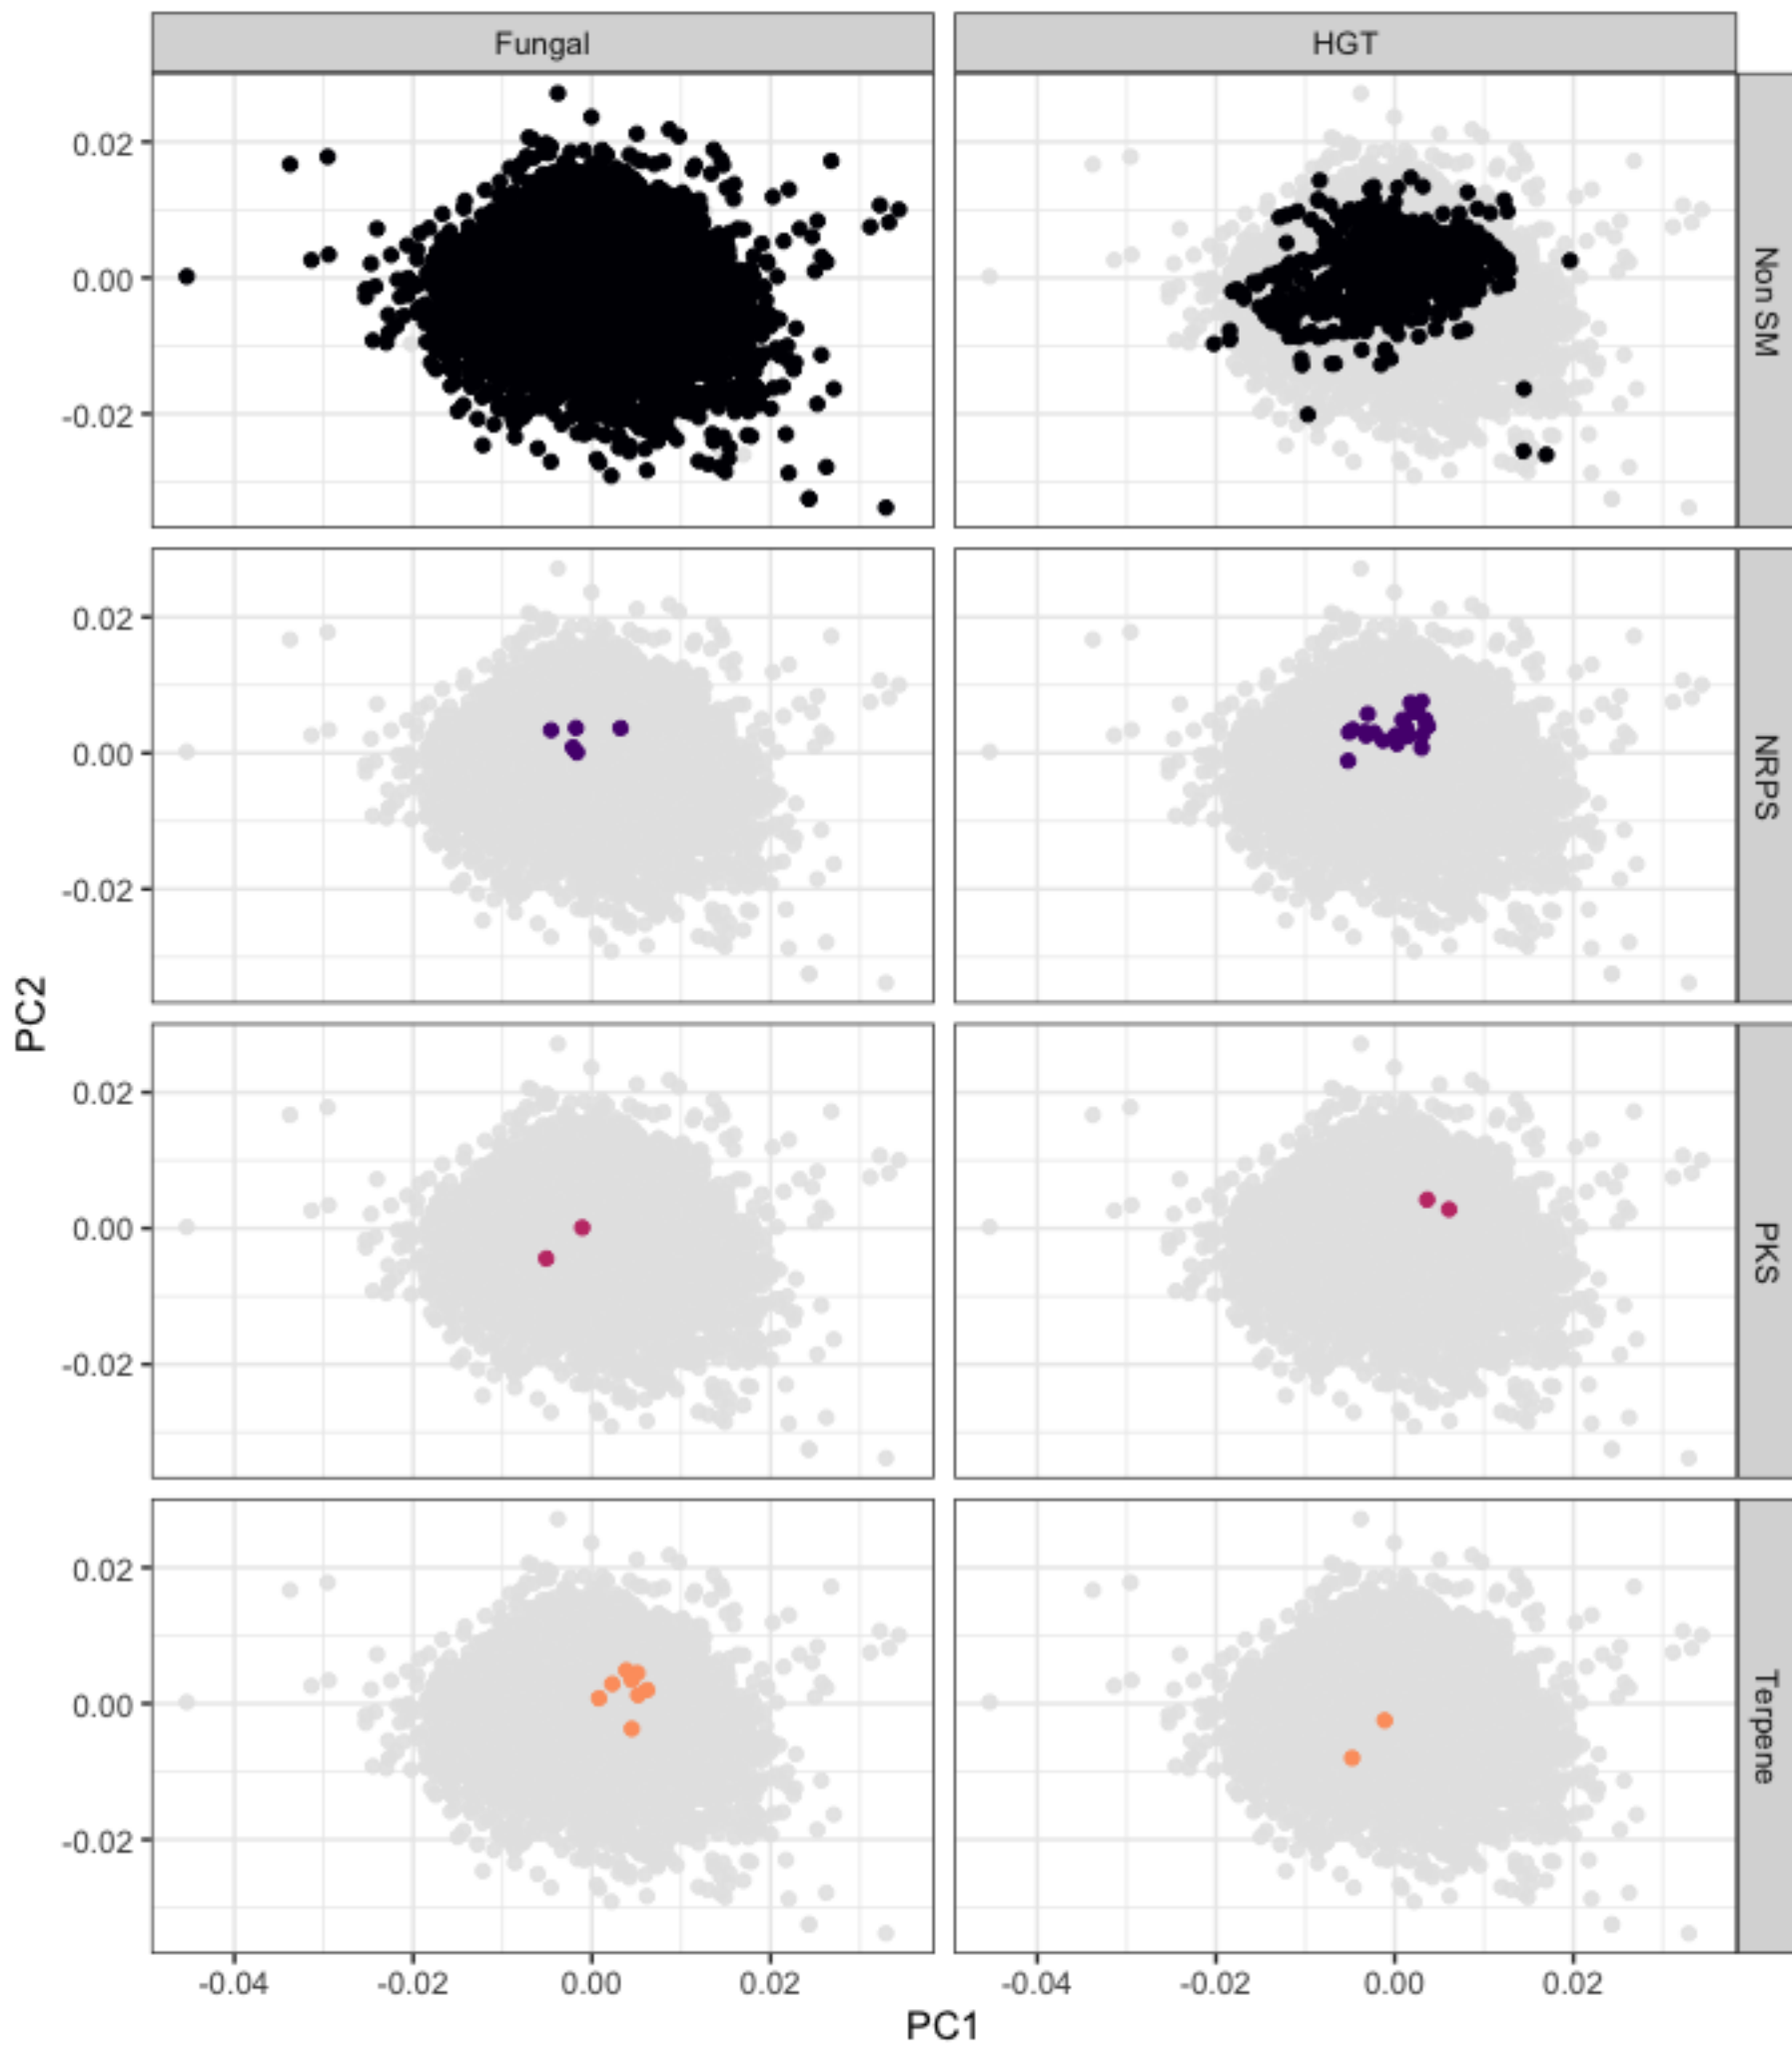

Supplement: Supplementary file 6 [file 1]

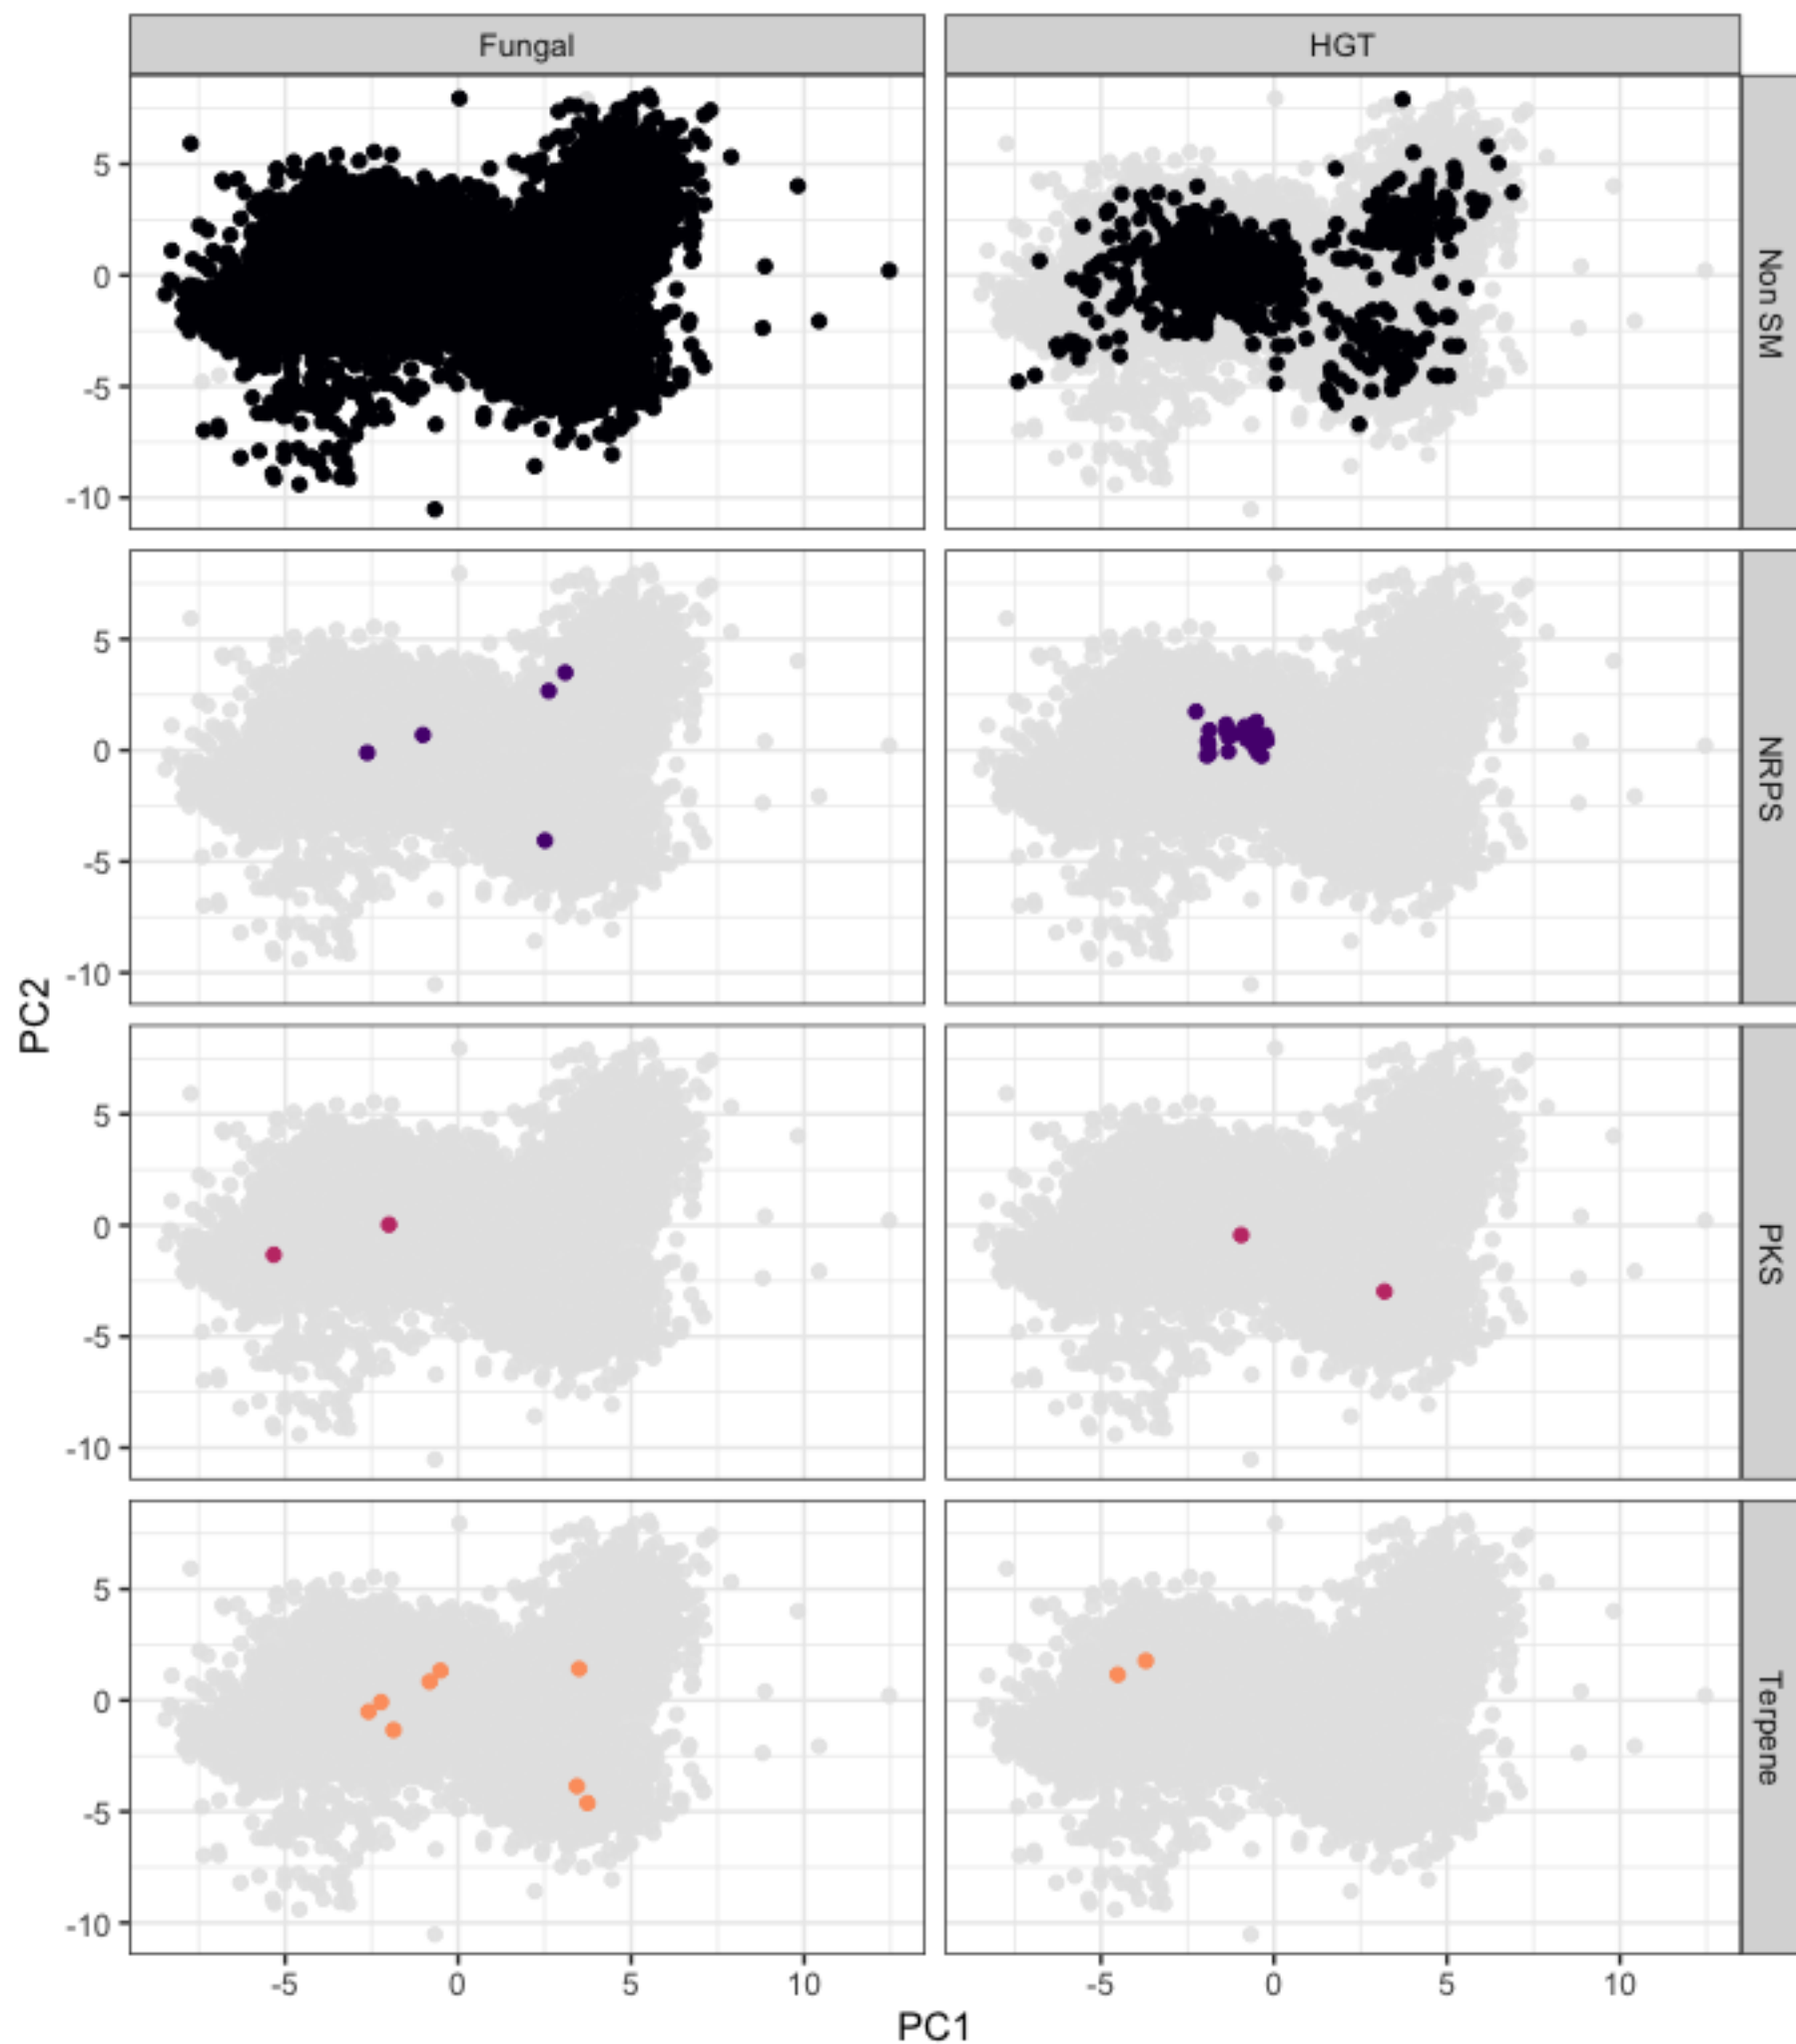

Supplement: Supplementary file 12 [file 1]
